# Supplementary material for: Highly efficient hydrogen generation from formic acid using a reduced graphene oxide-supported AuPd nanoparticle catalyst
Source: Royal Society of Chemistry journal article supplement (doi:10.1039/c5cc10311h), 2016-01-01
Supplement: c5cc10311h1.pdf [file c5cc10311h1.pdf]

## Electronic Supplementary Information

### Highly efficient hydrogen generation from formic acid using reduced graphene oxide-supported AuPd nanoparticle catalyst

Xinchun Yang,<sup>a,b</sup> Pradip Pachfule,<sup>a</sup> Yao Chen,<sup>a</sup> Nobuko Tsumori<sup>c</sup> and Qiang Xu<sup>\*a,b</sup>

<sup>a</sup>*National Institute of Advanced Industrial Science and Technology (AIST), Ikeda, Osaka, Japan.*

*E-mail: q.xu@aist.go.jp, qxuchem@hotmail.com; Fax: +81-72-751-9628; Tel: +81-72-751-9562*

<sup>b</sup>*Graduate School of Engineering, Kobe University, Nada Ku, Kobe, Hyogo, Japan*

<sup>c</sup>*Toyama National College of Technology, 13, Hongo-machi, Toyama, 939-8630, Japan*

## Chemicals

Natural graphite (Alfa Aesar, 325 mesh, metals basis, 99.8%), sodium nitrate ( $\text{NaNO}_3$ , Kishida Chemicals Co. Ltd., 99%), sulfuric acid ( $\text{H}_2\text{SO}_4$ , Kishida Chemicals Co. Ltd., 98%), potassium permanganate ( $\text{KMnO}_4$ , Kishida Chemicals Co. Ltd., 99.3%), hydrogen peroxide ( $\text{H}_2\text{O}_2$ , Kishida Chemicals Co. Ltd., 30%) and hydrochloric acid ( $\text{HCl}$ , Wako Pure Chemical Industries, Ltd., 35-37%) were used to prepare graphite oxide.

Potassium tetrachloropalladate ( $\text{K}_2\text{PdCl}_4$ , Wako Pure Chemical Industries, Ltd., >97%), gold chloride acid ( $\text{HAuCl}_4 \cdot 4\text{H}_2\text{O}$ , Kishida Chemicals Co. Ltd., 99%), cobalt acetate ( $\text{Co}(\text{CH}_3\text{COO})_2 \cdot 4\text{H}_2\text{O}$ , Kishida Chemicals Co. Ltd., 99%), sodium borohydride ( $\text{NaBH}_4$ , Sigma-Aldrich, 99%), phosphoric acid ( $\text{H}_3\text{PO}_4$ , Tokyo Chemical Industry Co. Ltd., >89%) were used to prepare the reduced graphene oxide (rGO) supported AuPd nanoparticles.

Formic acid (FA,  $\text{HCOOH}$ , Merck Millipore, 98%) and sodium formate (SF,  $\text{HCOONa}$ , Sigma-Aldrich, 99.5%) were used for hydrogen release with the catalysts.

## Preparation process of $(\text{Co}_x)_\text{E}\text{Au}_y\text{Pd}_{1-y}/\text{rGO}$ catalysts

GO was synthesized by the modified Hummers' method<sup>S1</sup> and then ultrasonicated in water to form a colloidal dispersion. A mixed solution (0.06 mmol) of  $\text{K}_2\text{PdCl}_4$  and  $\text{HAuCl}_4$  with or without  $\text{Co}(\text{CH}_3\text{COO})_2$  was added into the GO dispersion (0.1 wt%, 50 mL). After adding a fresh  $\text{NaBH}_4$  solution (3.7 M, 0.5 mL), the resulted mixture was stirred for 2 h. Then, the  $\text{Co}_x\text{Au}_y\text{Pd}_{1-y}/\text{rGO}$  precipitation was separated by centrifugation. Subsequently, the precipitation was re-dispersed into 2.5 vol%  $\text{H}_3\text{PO}_4$  (20 ml) under stirring for another 2 h. The rGO-supported AuPd nanoparticle catalyst was obtained by washing with water and centrifugation. The obtained catalyst was named as  $(\text{Co}_x)_\text{E}\text{Au}_y\text{Pd}_{1-y}/\text{rGO}$ , where  $(\text{Co})_\text{E}$  represents the acid etching of Co,  $x$  represents the molar ratio of  $\text{Co}/(\text{Au}+\text{Pd})$  and  $y$  is the molar ratio of  $\text{Au}/(\text{Au}+\text{Pd})$ .

### **Preparation process of the CO poisoned $(\text{Co}_3)_\text{E}\text{Au}_{0.6}\text{Pd}_{0.4}/\text{rGO}$ catalyst**

The obtained  $(\text{Co}_3)_\text{E}\text{Au}_{0.6}\text{Pd}_{0.4}/\text{rGO}$  catalyst was continuously stirred in a round-bottom flask (50 ml) under CO atmosphere for 1 hour. Then, the catalyst was used for the dehydrogenation of FA.

### **Characterization**

The powder X-ray diffraction measurements were carried out using a Rigaku Ultima IV diffractometer with Cu-K $\alpha$  radiation. The metal contents of the catalyst were analyzed using ICP-OES on Thermo Scientific iCAP6300. The TEM and HAADF-STEM images and EDX spectra were taken by Transmission electron microscope (TEM, TECNAI G<sup>2</sup> F20) with operating voltage at 200 kV equipped with energy-dispersive X-ray (EDX) detector. The N<sub>2</sub> adsorption/desorption isotherms were obtained at 77 K using automatic volumetric adsorption equipment (Belsorp-max). XPS spectra were recorded on a Shimadzu ESCA-3400 using an Mg K $\alpha$  source. The generated gas from FA was analyzed by GC-8A (molecular sieve 5A, Ar as carrier gas) and GC-8A (Porapak N, He as carrier gas) analyzers (Shimadzu).

### **Catalysis activity determination**

An aqueous suspension containing the as-prepared catalyst was placed in a two-neck round-bottom flask, which was placed in a water bath under ambient atmosphere. A gas burette filled with water was connected to the reaction flask to measure the volume of released gas. The reaction was started when the mixed aqueous solution of FA-SF was injected into the sealed flask to form a 4.5 mL of suspension. The molar ratio of AuPd/FA was fixed at 0.02 for all the catalytic reactions. The volume of the evolved gas was monitored by recording the displacement of water in the gas burette.

### The turnover frequency (TOF) calculations

The TOF reported here is an apparent TOF value based on the number of (Au+Pd) atoms in catalyst, which is calculated from the equation as follows:

$$TOF = P_0 V / 2RT n_{AuPd} t$$

where  $P_0$  is the atmospheric pressure (101325 Pa),  $V$  is the final generated volume of (H<sub>2</sub> + CO<sub>2</sub>) gas,  $R$  is the universal gas constant (8.3145 m<sup>3</sup> Pa mol<sup>-1</sup> K<sup>-1</sup>),  $T$  is the room temperature (298 K),  $n_{AuPd}$  is the total molar number of (Au + Pd) atoms in catalyst and  $t$  is the completion time of the reaction in hour.

### Durability test

After the catalytic reaction, the catalyst was recollected by centrifugation, washed with water and recycled for durability. In each cycle 100 % FA is decomposed, corresponding to a TON value of 50 for each cycle.

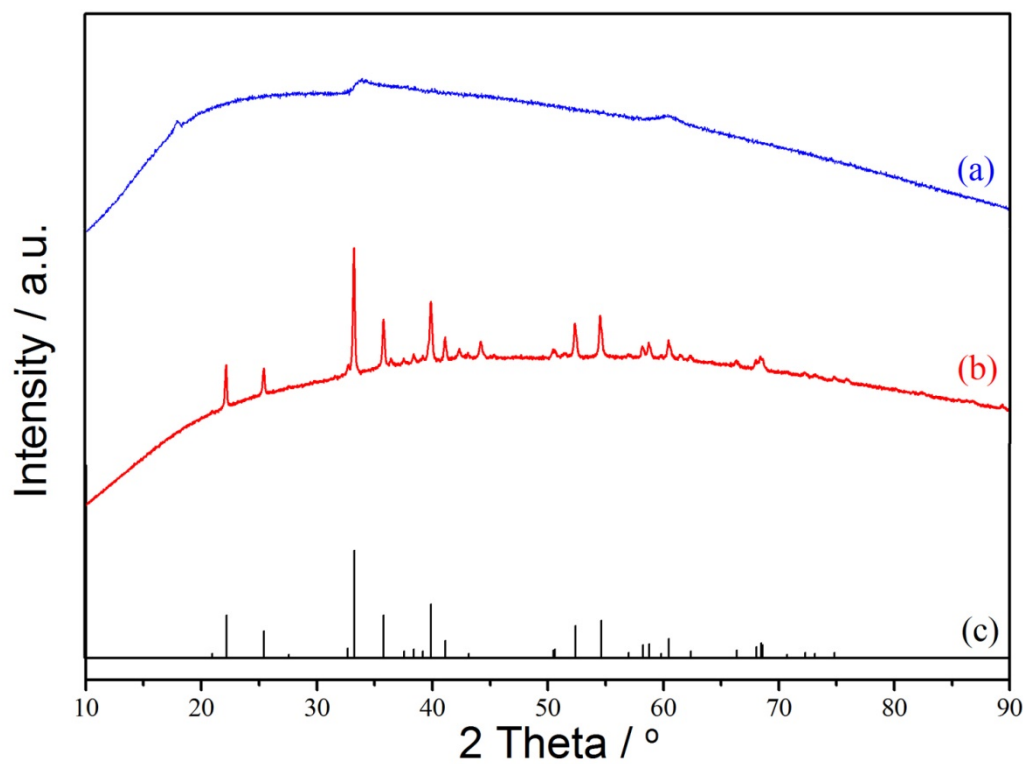

**Figure S1.** XRD patterns of the products from the reaction between  $\text{Co}(\text{CH}_3\text{COO})_2$  and  $\text{NaBH}_4$  (a) before and (b) after annealing (823 K, 3 h, Ar), and (c) JCPDS: 25-0102 ( $\text{Co}_3(\text{BO}_3)_2$ ).

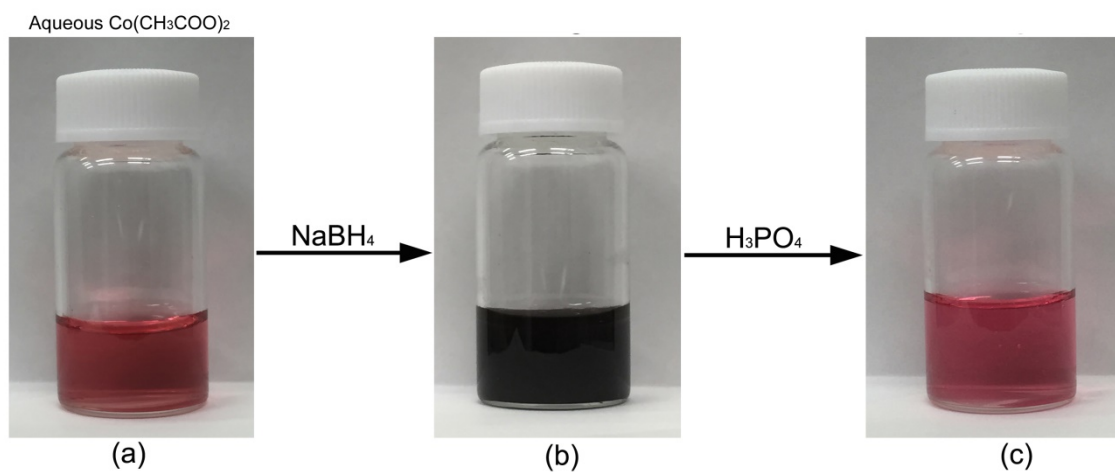

**Figure S2.** Photographs of (a) aqueous  $\text{Co}(\text{CH}_3\text{COO})_2$  solution and the products from the reaction between  $\text{Co}(\text{CH}_3\text{COO})_2$  and  $\text{NaBH}_4$  at room temperature (b) before and (c) after etching with  $\text{H}_3\text{PO}_4$ .

The reaction between  $\text{Co}(\text{CH}_3\text{COO})_2$  and  $\text{NaBH}_4$  in a molar ratio of 1:3.7 under an ambient condition for 2 h results in the formation of a black precipitation (Figure S2b), which exhibits very broad X-ray diffractions (XRD) (Figure S1a), characteristic of an amorphous phase. The sample crystallizes by annealing at 823 K for 3 h (Ar atmosphere), displaying the XRD peaks (Figure S1b) corresponding to  $\text{Co}_3(\text{BO}_3)_2$  phase (JCPDS: 25-0102, Figure S1c).<sup>S2</sup> The precipitation  $\text{Co}_3(\text{BO}_3)_2$  can be readily dissolved in  $\text{H}_3\text{PO}_4$  (Figure S2c). Thus, in our work, the cobalt was used as the sacrificial agent for the NNMSA.

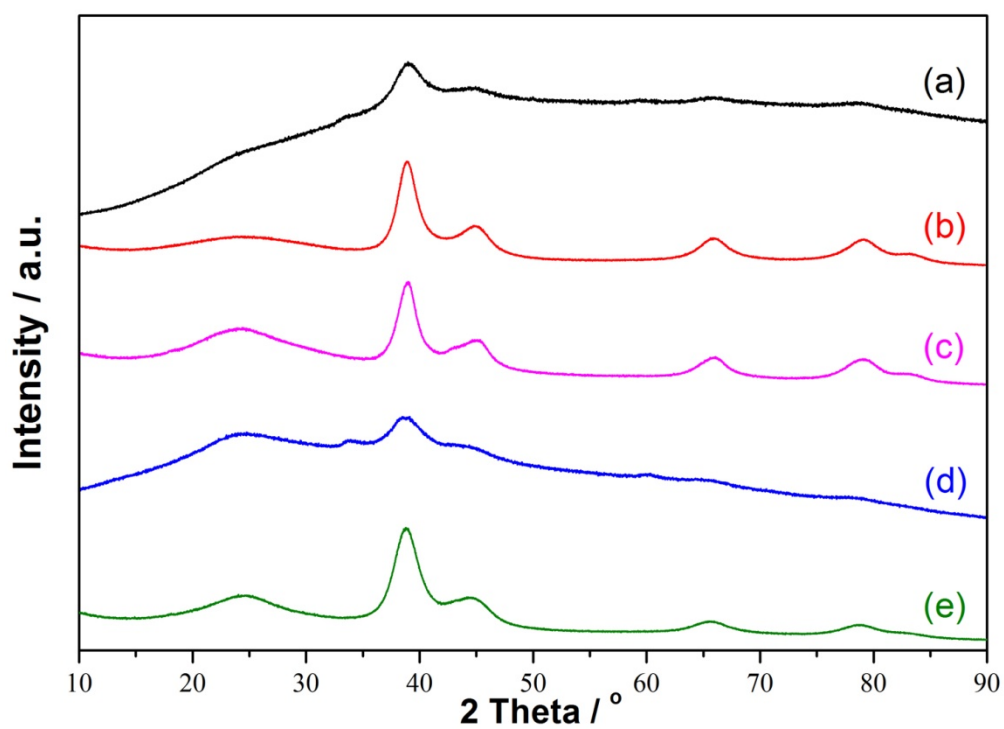

**Figure S3.** XRD patterns of (a)  $\text{Co}_3\text{Au}_{0.6}\text{Pd}_{0.4}$ , (b)  $(\text{Co}_3)_\text{E}\text{Au}_{0.6}\text{Pd}_{0.4}$ , (c)  $\text{Au}_{0.6}\text{Pd}_{0.4}/\text{rGO}$ , (d)  $\text{Co}_3\text{Au}_{0.6}\text{Pd}_{0.4}/\text{rGO}$ , and (e)  $(\text{Co}_3)_\text{E}\text{Au}_{0.6}\text{Pd}_{0.4}/\text{rGO}$ .

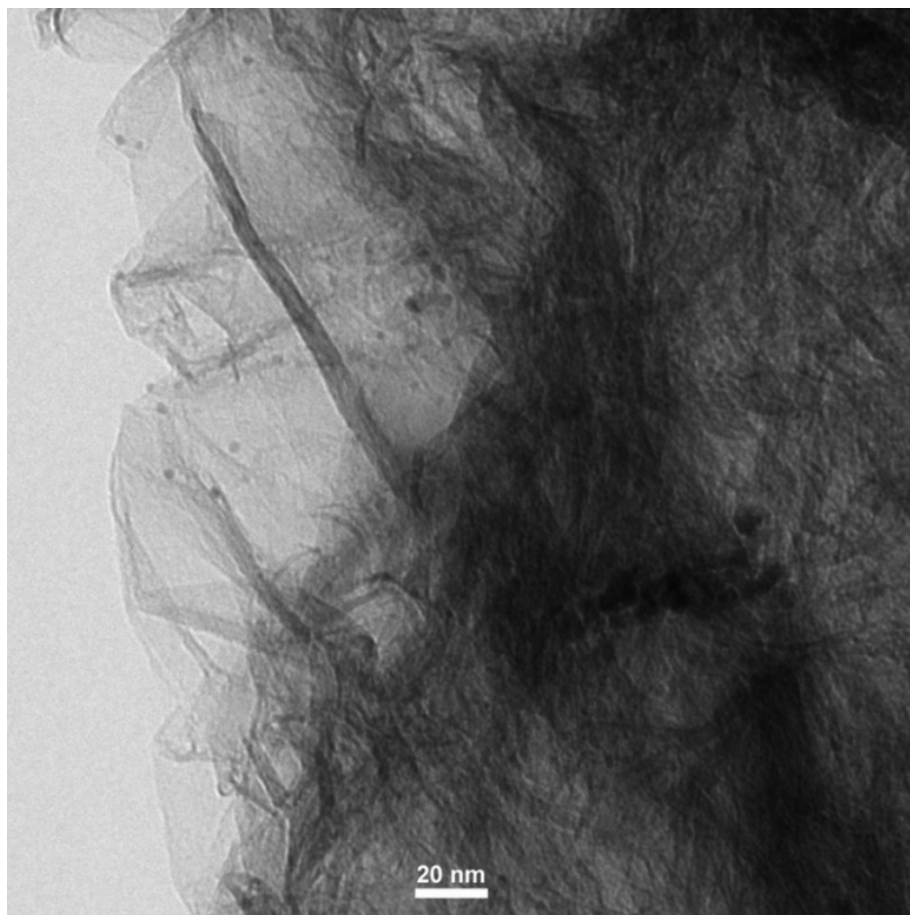

**Figure S4.** TEM image of Au<sub>0.6</sub>Pd<sub>0.4</sub>/rGO.



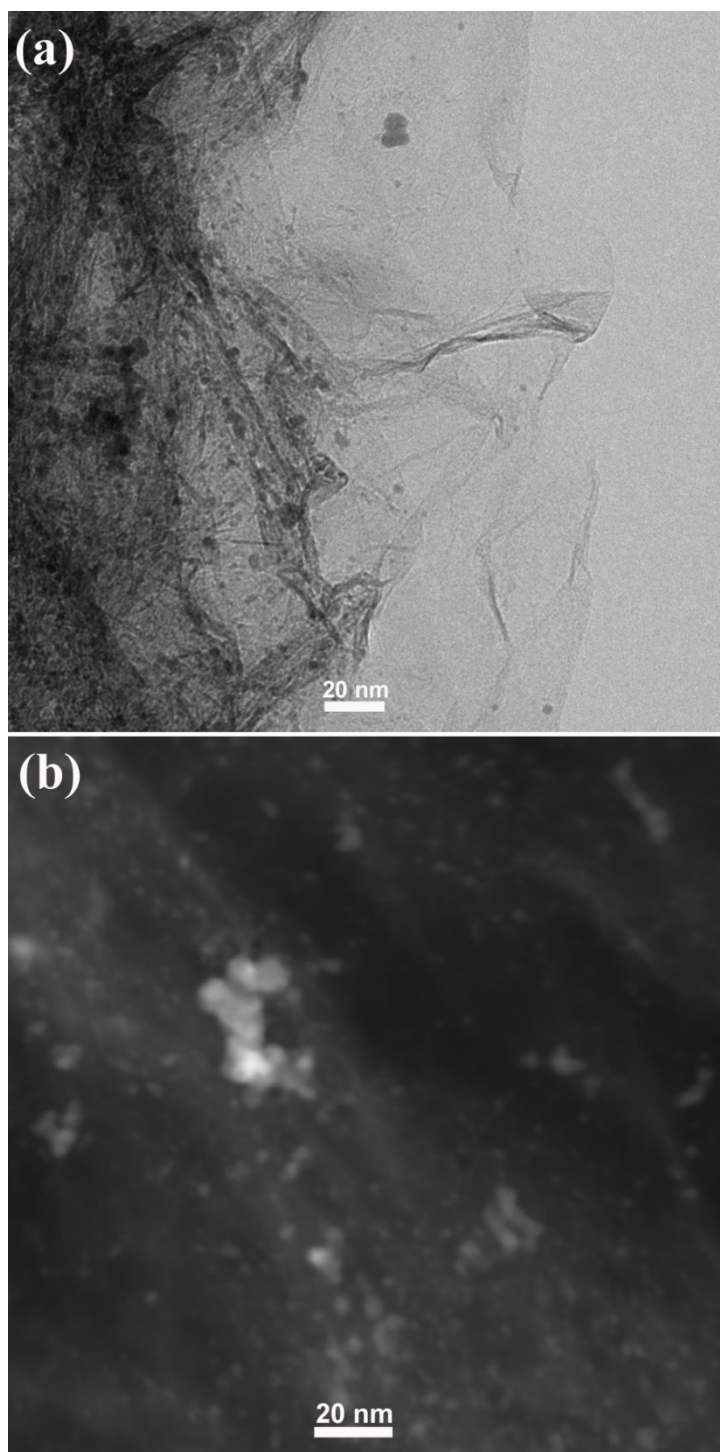

**Figure S5.** (a) TEM and (b) HADDF-STEM images of  $\text{Co}_3\text{Au}_{0.6}\text{Pd}_{0.4}/\text{rGO}$ .

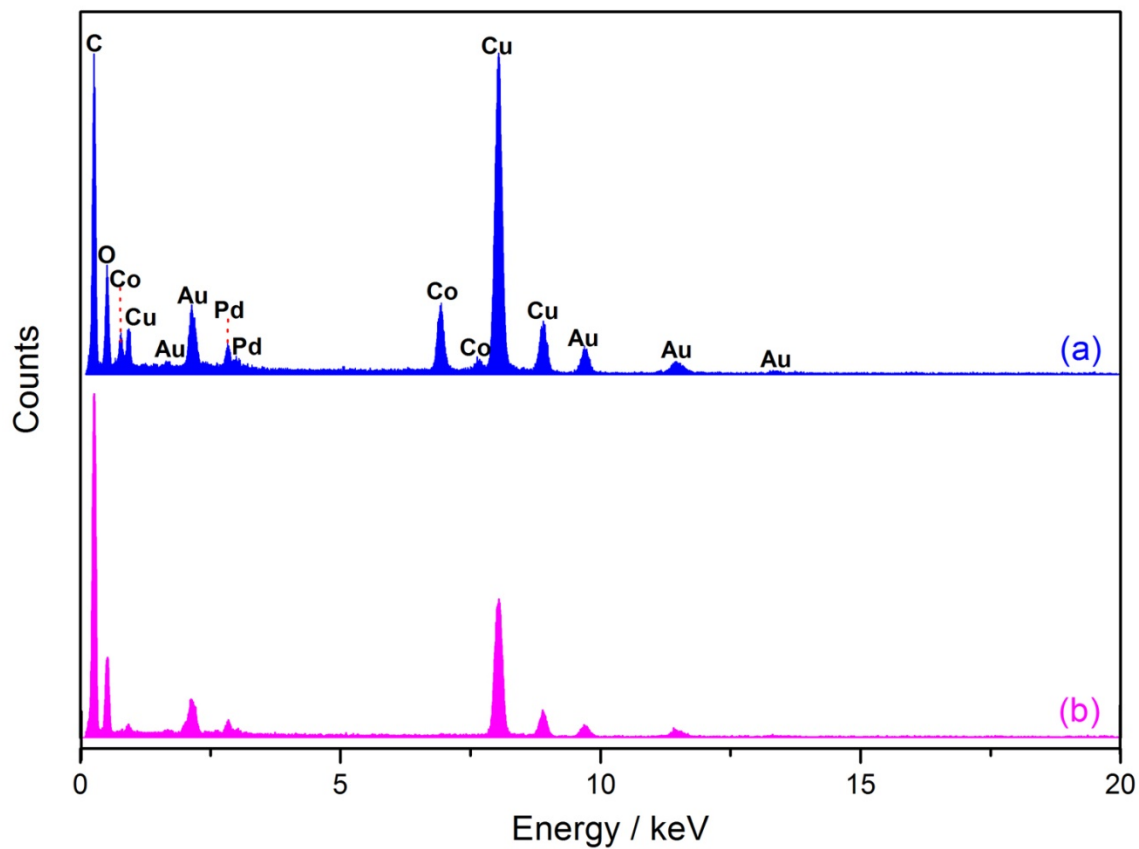

**Figure S6.** EDX patterns of (a)  $\text{Co}_3\text{Au}_{0.6}\text{Pd}_{0.4}/\text{rGO}$  and (b)  $(\text{Co}_3)_\text{E} \text{Au}_{0.6}\text{Pd}_{0.4}/\text{rGO}$ .

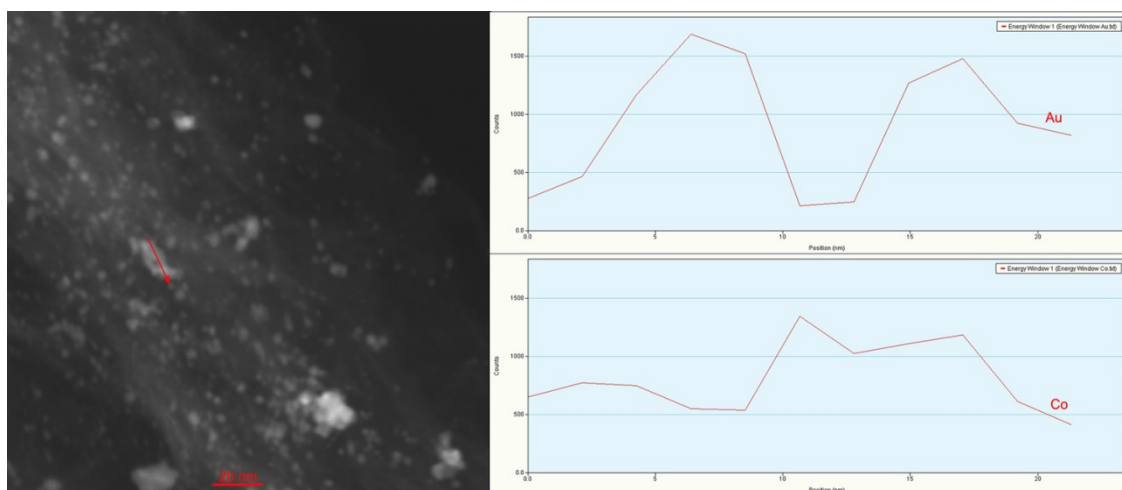

**Figure S7.** (a) HAADF-STEM image of  $\text{Co}_3\text{Au}_{0.6}\text{Pd}_{0.4}/\text{rGO}$  and (b) the corresponding EDX-line scan along the red line in (a).

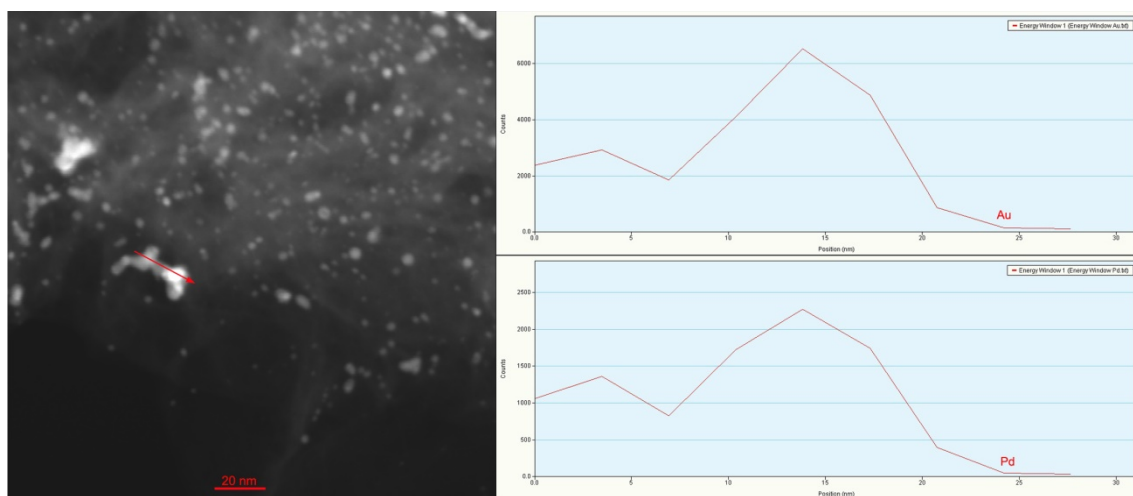

**Figure S8.** (a) HAADF-STEM image of  $(\text{Co}_3)_\text{E} \text{Au}_{0.6}\text{Pd}_{0.4}/\text{rGO}$  and (b) the corresponding EDX-line scan along the red line in (a).

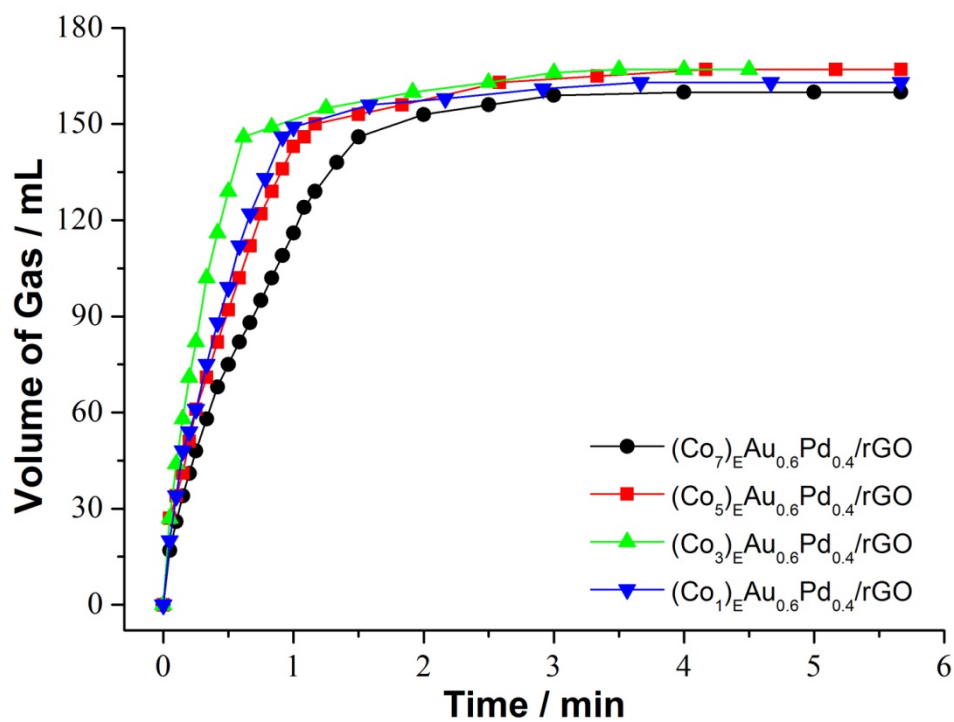

**Figure S9.** Volume of the generated gas (CO<sub>2</sub>+H<sub>2</sub>) versus time for the dehydrogenation of FA over the (Co<sub>x</sub>)<sub>E</sub>Au<sub>0.6</sub>Pd<sub>0.4</sub>/rGO catalyst at 323 K ( $n_{\text{AuPd}}/n_{\text{FA}}=0.02$ ,  $n_{\text{SF}}/n_{\text{FA}}=2.5$ ).

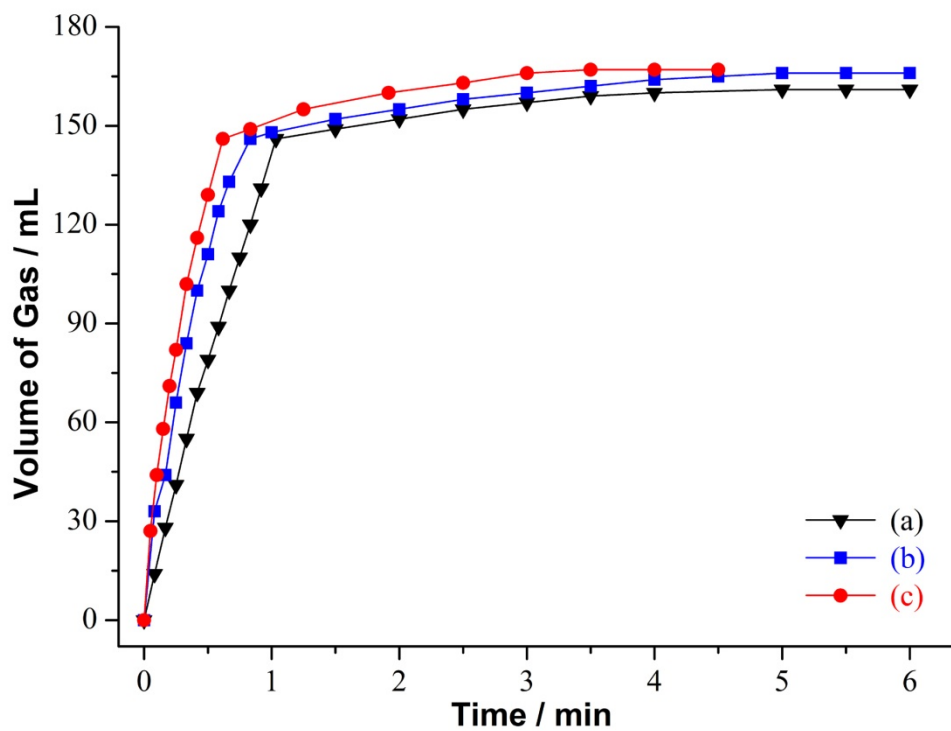

**Figure 10.** Volume of the generated gas ( $\text{CO}_2 + \text{H}_2$ ) versus time for the dehydrogenation of FA over the  $(\text{Co}_3)_\text{E}\text{Au}_{0.6}\text{Pd}_{0.4}/\text{rGO}$  catalyst with different loadings of metals (a)  $n_{\text{AuPd}} = 0.04$  mmol, (b)  $n_{\text{AuPd}} = 0.05$  mmol and (c)  $n_{\text{AuPd}} = 0.06$  mmol and the same GO amount at 323 K ( $n_{\text{SF}}/n_{\text{FA}} = 2.5$ , FA = 3 mmol), showing TOF values of 4338, 4300, and 4840  $\text{h}^{-1}$ , respectively.

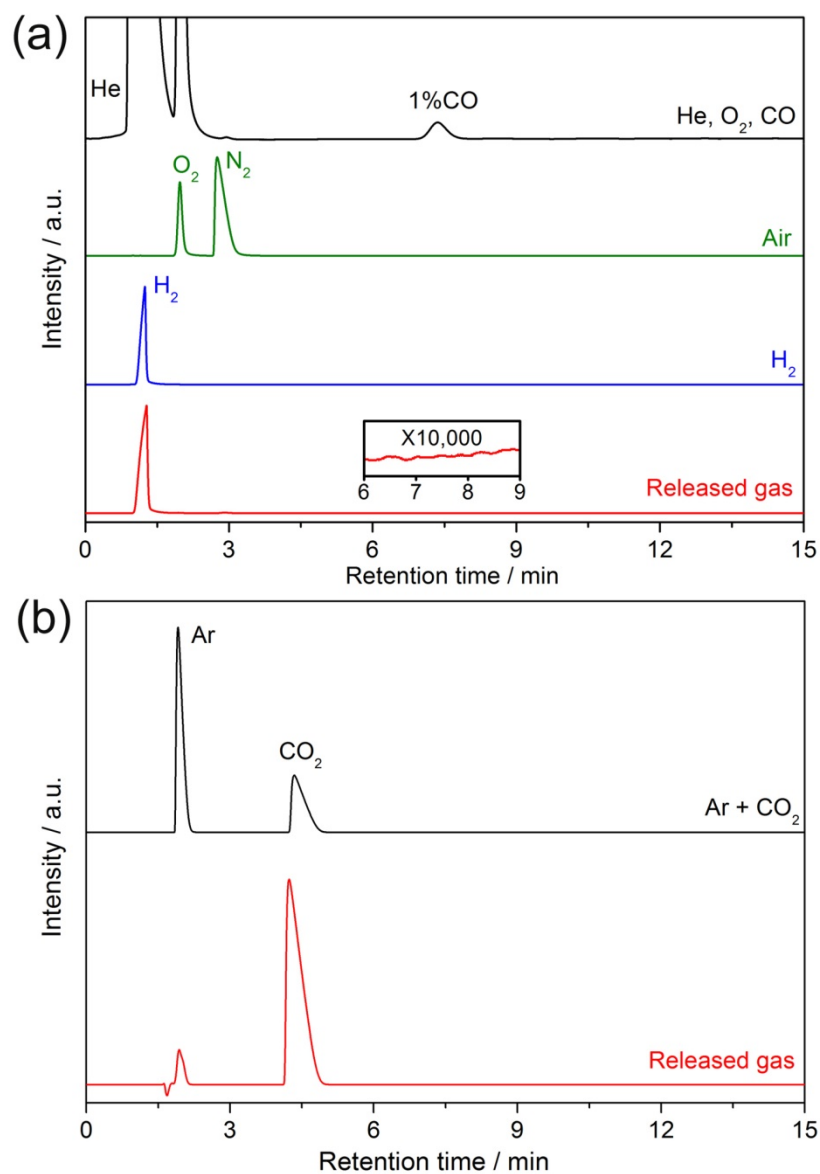

**Figure S11.** Gas chromatograms (GC) of the released gas (under Ar atmosphere) from the decomposition of FA in the FA/SF system ( $n_{\text{SF}}/n_{\text{FA}}=2.5$ ) over the  $(\text{Co}_3)_\text{E}\text{Au}_{0.6}\text{Pd}_{0.4}/\text{rGO}$  catalyst at 323 K with (a) CO, air and H<sub>2</sub> and (b) CO<sub>2</sub> as reference gas, indicative of the absence of CO and presence of CO<sub>2</sub> and H<sub>2</sub> in the released gas.

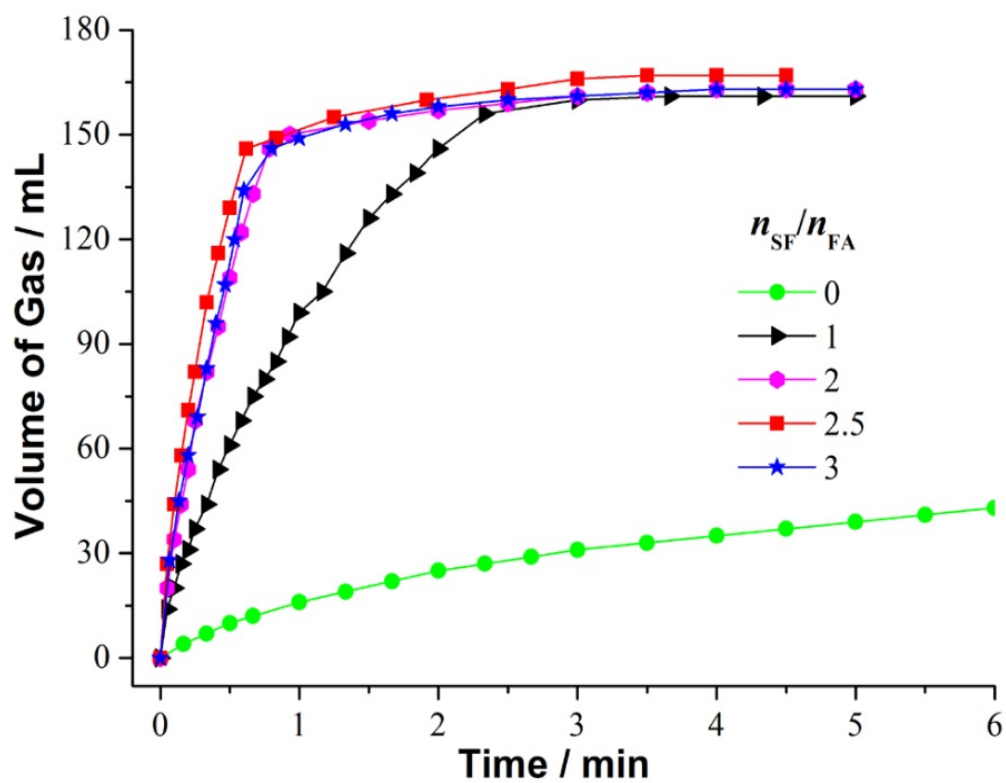

**Figure S12.** Volume of the generated gas ( $\text{CO}_2+\text{H}_2$ ) versus time for the dehydrogenation of FA with different  $n_{\text{SF}}/n_{\text{FA}}$  molar ratios over the  $(\text{Co}_3)_\text{E}\text{Au}_{0.6}\text{Pd}_{0.4}/\text{rGO}$  catalyst at 323 K ( $n_{\text{AuPd}}/n_{\text{FA}}=0.02$ ).



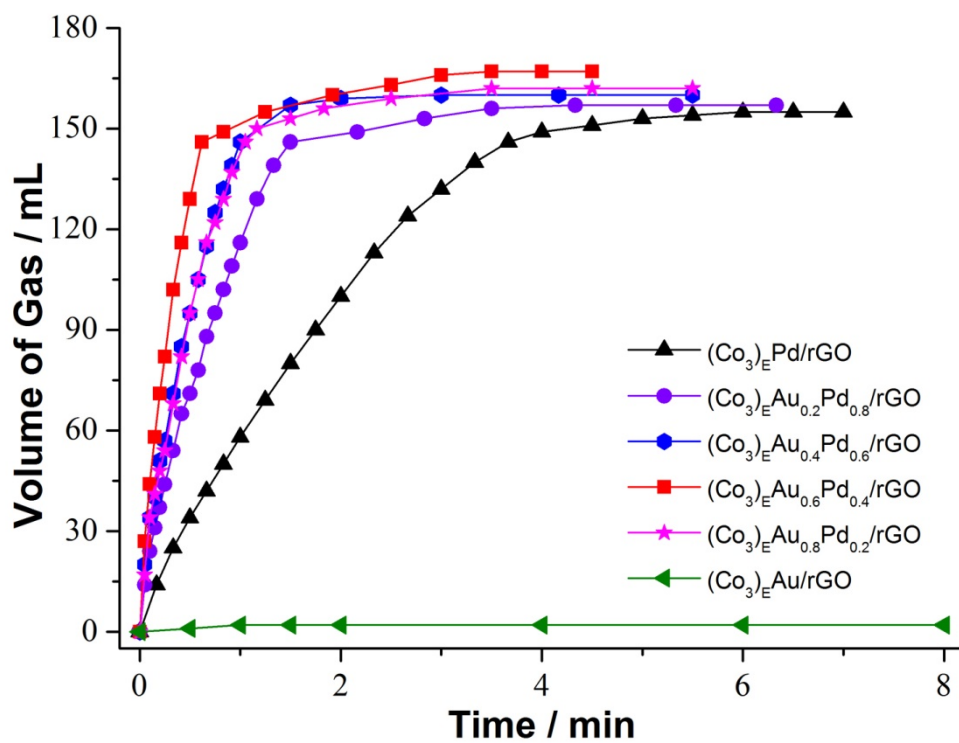

**Figure S13.** Volume of the generated gas (CO<sub>2</sub>+H<sub>2</sub>) versus time for the dehydrogenation of FA over the (Co<sub>3</sub>)<sub>E</sub>Au<sub>y</sub>Pd<sub>1-y</sub>/rGO catalysts at 323 K ( $n_{\text{AuPd}}/n_{\text{FA}} = 0.02$ ,  $n_{\text{SF}}/n_{\text{FA}} = 2.5$ ).

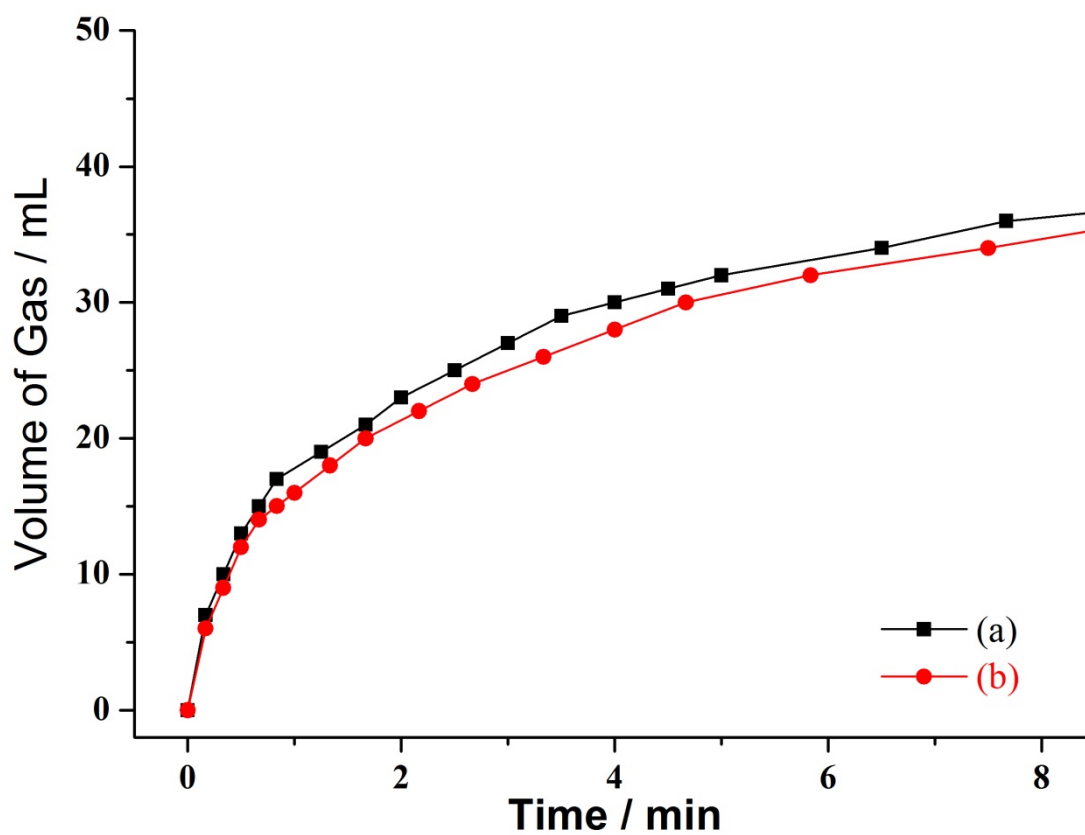

**Figure S14.** Volumes of the generated gas ( $\text{CO}_2 + \text{H}_2$ ) versus time for the dehydrogenation of FA over the support-free (a)  $(\text{Co}_3)_\text{E}\text{Au}_{0.6}\text{Pd}_{0.4}$  and (b)  $\text{Au}_{0.6}\text{Pd}_{0.4}$  catalysts at 323 K ( $n_{\text{AuPd}}/n_{\text{FA}} = 0.02$ ,  $n_{\text{SF}}/n_{\text{FA}} = 2.5$ ).

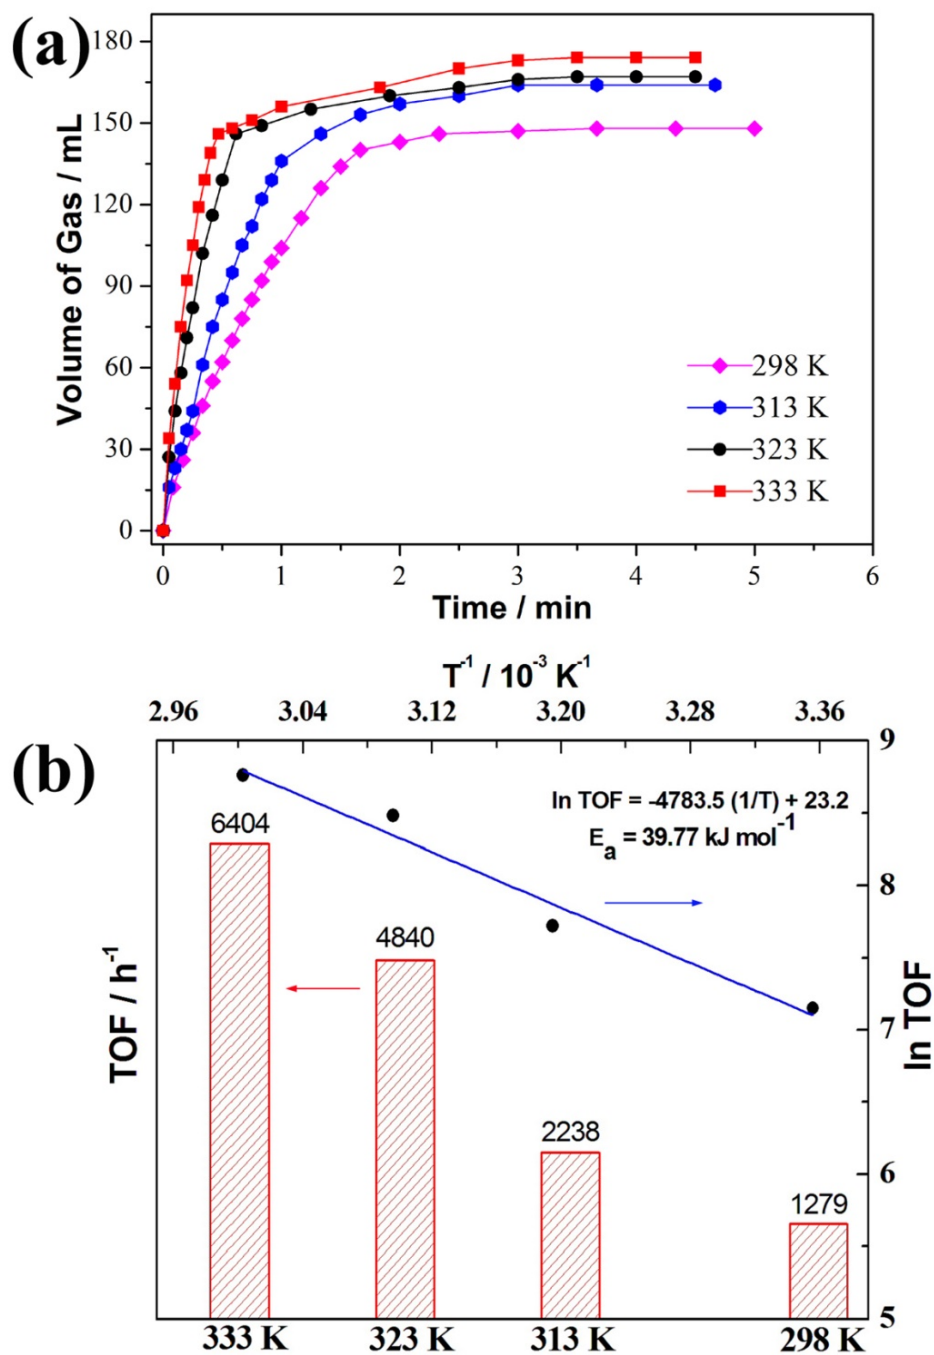

**Figure S15.** (a) Volume of the generated gas ( $\text{CO}_2 + \text{H}_2$ ) versus time, (b) Arrhenius plot and TOF values for the dehydrogenation of FA over the  $(\text{Co}_3)_\text{E}\text{Au}_{0.6}\text{Pd}_{0.4}/\text{rGO}$  catalyst at different temperatures ( $n_{\text{AuPd}}/n_{\text{FA}} = 0.02$ ,  $n_{\text{SF}}/n_{\text{FA}} = 2.5$ ).

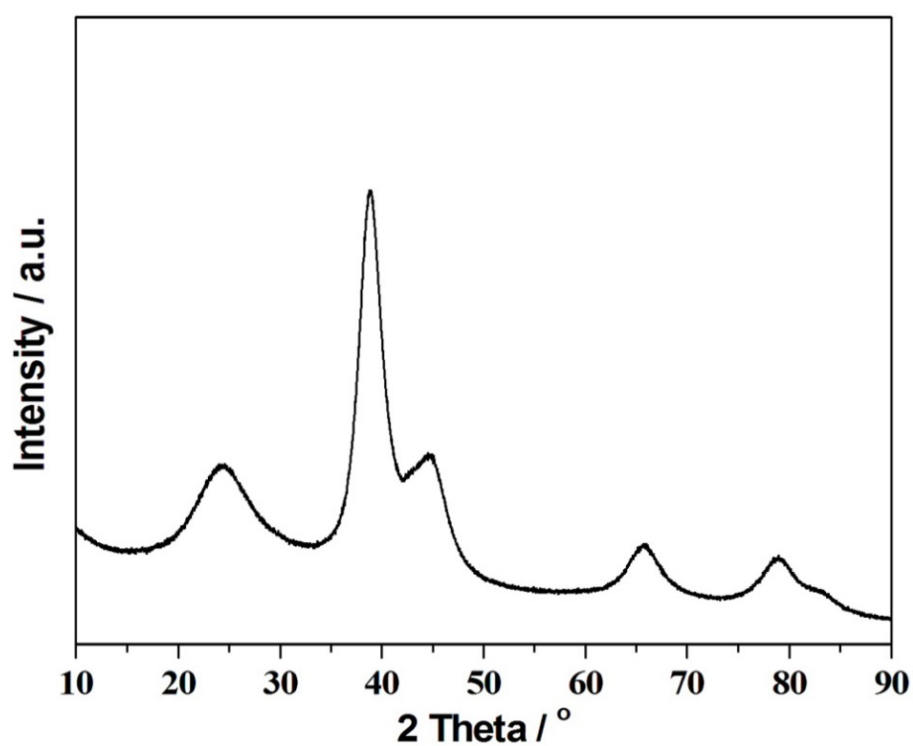

**Figure S16.** XRD pattern of the  $(\text{Co}_3)_\text{E}\text{Au}_{0.6}\text{Pd}_{0.4}/\text{rGO}$  catalyst after 5 catalytic cycles ( $n_{\text{AuPd}}/n_{\text{FA}} = 0.02$ ,  $n_{\text{SF}}/n_{\text{FA}} = 2.5$ , 323 K).

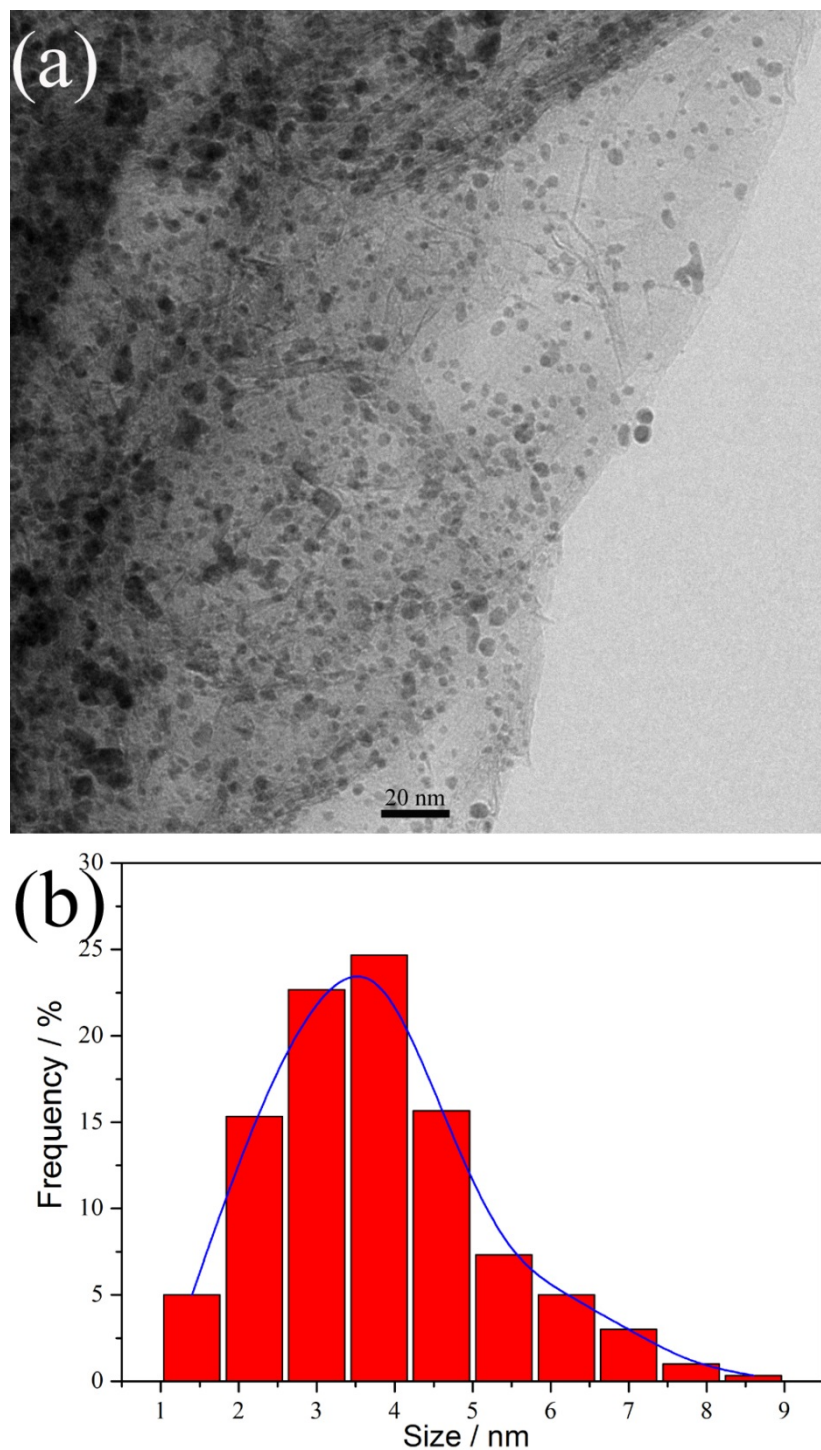

**Figure S17.** (a) TEM image and (b) size histogram of AuPd NPs of the  $(\text{Co}_3)_\text{E}\text{Au}_{0.6}\text{Pd}_{0.4}/\text{rGO}$  catalyst after 5 cycles for dehydrogenation of FA ( $n_{\text{AuPd}}/n_{\text{FA}} = 0.02$ ,  $n_{\text{SF}}/n_{\text{FA}} = 2.5$ , 323 K).

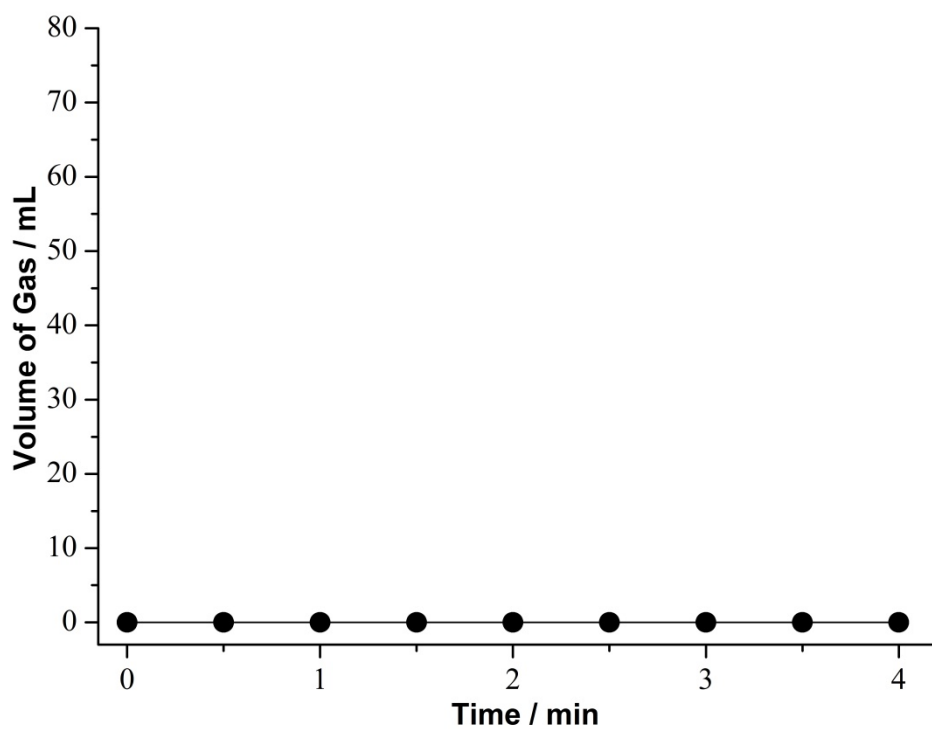

**Figure S18.** Volume of the generated gas ( $\text{CO}_2 + \text{H}_2$ ) versus time for the dehydrogenation of FA over the CO poisoned  $(\text{Co}_3)_\text{E}\text{Au}_{0.6}\text{Pd}_{0.4}/\text{rGO}$  catalyst, prepared by exposing the catalyst to CO atmosphere, at 323 K ( $n_{\text{AuPd}}/n_{\text{FA}} = 0.02$ ,  $n_{\text{SF}}/n_{\text{FA}} = 2.5$ ).

Table S1 Catalytic activities for dehydrogenation of formic acid catalysed by related heterogeneous catalysts.

| Catalyst                                                          | Solvent/medium                | Temp. (K) | CO evolution | TOF ( $\text{h}^{-1}$ ) | Ref.      |
|-------------------------------------------------------------------|-------------------------------|-----------|--------------|-------------------------|-----------|
| $(\text{Co}_3)_\text{E}\text{Au}_{0.6}\text{Pd}_{0.4}/\text{rGO}$ | Aqueous/ $\text{HCOONa}$      | 323       | No           | 4840                    | This work |
| $\text{Pd/C}_\text{m}$                                            | Aqueous/ $\text{HCOONa}$      | 323       | No           | 4452                    | S3        |
| $\text{Au@ Schiff\_SiO}_2$                                        | Aqueous                       | 323       | No           | 4368                    | S4        |
| $\text{Pd/PDA\_rGO}$                                              | Aqueous/ $\text{HCOONa}$      | 323       | No           | 3810                    | S5        |
| $\text{Au@ Schiff\_SiO}_2$                                        | No                            | 323       | No           | 2882                    | S4        |
| $(\text{Co}_6)\text{Ag}_{0.1}\text{Pd}_{0.4}/\text{rGO}$          | Aqueous/ $\text{HCOONa}$      | 323       | No           | 2739                    | S6        |
| $\text{Pd/MS}_\text{C}_30$                                        | Aqueous/ $\text{HCOONa}$      | 323       | No           | 2623                    | S7        |
| $\text{Au/ZrO}_2$ NCs                                             | $5\text{HCOOH}/2\text{NEt}_3$ | 323       | No           | 1593                    | S8        |

Table S2 TOFs for the dehydrogenation of FA over  $(\text{Co}_3)_\text{E}\text{Au}_{0.6}\text{Pd}_{0.4}/\text{rGO}$  for the cycles of durability test ( $n_{\text{AuPd}}/n_{\text{FA}} = 0.02$ ,  $n_{\text{SF}}/n_{\text{FA}} = 2.5$ , 323 K).

| Cycles | TOF / $\text{h}^{-1}$ |
|--------|-----------------------|
| 1st    | 4840                  |
| 2nd    | 4369                  |
| 3rd    | 4592                  |
| 4th    | 3987                  |
| 5th    | 4265                  |

## References

- [S1] (a) W. S. Hummers and R. E. Offeman, *J. Am. Chem. Soc.*, 1958, **80**, 1339; (b) Y. Chen, X. Zhang, P. Yu and Y. Ma, *Chem. Commun.*, 2009, 4527.
- [S2] G. N. Glaviee, K. J. Klabunde, C. M. Sorensen and G. C. Hadjapanayis, *Langmuir*, 1992, **8**, 771.
- [S3] Q. L. Zhu, N. Tsumori and Q. Xu, *J. Am. Chem. Soc.*, 2015, **137**, 11743.
- [S4] Q. G. Liu, X. F. Yang, Y. Q. Huang, S. T. Xu, X. Su, X. L. Pan, J. M. Xu, A. Q. Wang, C. H. Liang, X. K. Liang, X. K. Wang and T. Zhang, *Energy Environ. Sci.*, 2015, **8**, 3207.
- [S5] F. Z. Song, Q. L. Zhu, N. Tsumori and Q. Xu, *ACS catal.*, 2015, **5**, 5141.
- [S6] Y. Chen, Q. L. Zhu, N. Tsumori and Q. Xu, *J. Am. Chem. Soc.*, 2015, **137**, 106.
- [S7] Q. L. Zhu, N. Tsumori and Q. Xu, *Chem. Sci.*, 2014, **5**, 195.
- [S8] Q. Y. Bi, X. L. Du, Y. M. Liu, Y. Cao, H. Y. He and K. N. Fan, *J. Am. Chem. Soc.*, 2012, **134**, 8926.
